# Supplementary material
Source: PubMed Central journal article supplement (PMC4507048)
Supplement: NIHMS63651-supplement-1.pdf [file NIHMS63651-supplement-1.pdf]

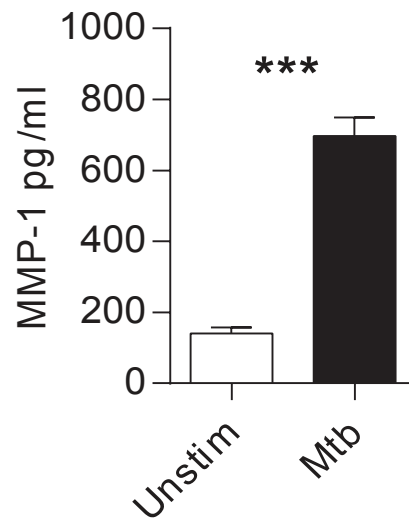

**Supplementary figure 1: MMP-1 secretion by Mtb-infected monocytes is increased at 24h.**

Monocytes were infected with Mtb H37Rv at MOI 1 and supernatants harvested at 24h. MMP-1 concentration was analyzed by luminex. Mtb infection significantly increased MMP-1 secretion.

|                          | CoMCont        | CoMTb                                        |
|--------------------------|----------------|----------------------------------------------|
| <b>Cytokines</b>         |                |                                              |
| IL-1 $\beta$             | 165 (39-192)   | 31813 (7994 - 39014)                         |
| IL-6                     | 1 (1-1)        | 50914 (11903 - 63160)                        |
| TNF $\alpha$             | 1 (1-1)        | 15369 (1607 - 63755)                         |
| IFN $\alpha$             | 6 (6-6)        | 340 (69 - 550)                               |
| IL-12 (p40/p70)          | 2 (2-2)        | 752 (167 - 3853)                             |
| IL-1 receptor antagonist | 628 (144-744)  | 8893 (3774 - 11242)                          |
| IL-2 receptor            | 2 (2-25)       | 994 (574 - 1326)                             |
| <b>Chemokines</b>        |                |                                              |
| CCL2 ((MCP-1)            | 6 (6-10)       | 1184 (334 - 2780)<br>215660 (19320 - 361100) |
| CCL3 (MIP-1 $\alpha$ )   | 4 (4-4)        |                                              |
| CCL4 (MIP-1 $\beta$ )    | 2 (2-2)        | 19799 (5630 -238242)                         |
| CXCL8 (IL-8)             | 34 (9-41)      | 96439 (7176 - 180980)                        |
| CXCL9 (MIG)              | 47 (8-86)      | 175 (50 - 217)                               |
| <b>Growth factors</b>    |                |                                              |
| GM-CSF                   | 3 (3-3)        | 286 (70-1324)                                |
| VEGF                     | 35 (7-45)      | 168 (95 - 192)                               |
| G-CSF                    | 3 (3-3)        | 1394 (245 - 1896)                            |
| FGF                      | 256 (64 - 259) | 343 (94 - 378)                               |

**Supplementary table 1: Cytokines, chemokines and growth factors in CoMCont and CoMTb.**

Median levels and interquartile ranges (in brackets) as shown. Units pg/ml. Abbreviations:

CoMCont – Conditioned medium from control uninfected monocytes. CoMTb – Conditioned

Medium from *Mtb* infected monocytes. Additional analytes that were measured by luminex array that

did not significantly change between conditions were IFN- $\gamma$ , IL-2, IL-4, IL-5, IL-7, IL-10, IL-13, IL-

15, IL-17, CCL-5 (RANTES), CXCL-10 (IP-10), CCL-11 (Eotaxin), EGF and HGF.
